# Supplementary material for: Helicobacterpylori eradication following endoscopic resection might prevent metachronous gastric cancer: a systematic review and meta-analysis of studies from Japan and Korea
Source: PubMed Central journal article supplement (PMC11402824; doi:10.3389/fmed.2024.1393498), 2024-09-02

---

# ***Helicobacter pylori* Eradication Following Endoscopic Resection Might Prevent Metachronous Gastric Cancer:**

## **A Systematic Review and Meta-analysis of Studies From Japan and Korea**

**Authors:** Tian-Hang Yu,<sup>1</sup> Dan Bai,<sup>2</sup> Kai Liu,<sup>1</sup> Wei-Han Zhang,<sup>1</sup> Xin-Zu Chen,<sup>1,3,4</sup> Jian-Kun Hu;<sup>1</sup> on behalf of the SIGES Research Group

### **Affiliations:**

1. Gastric Cancer Center & Gastric Cancer Laboratory, Department of General Surgery, West China Hospital, Sichuan University, Chengdu, China
2. Department of Day Surgery, General Practice Medical Center, West China Hospital, Sichuan University, Chengdu, China
3. Ya'an Cancer Prevention and Control Center, Ya'an People's Hospital - West China Ya'an Hospital, Sichuan University, Ya'an, China
4. Ya'an Key Laboratory for High Altitude Medicine, Ya'an People's Hospital - West China Ya'an Hospital, Sichuan University, Ya'an, China

**Correspondence:** Xin-Zu Chen, Gastric Cancer Center and Laboratory of Gastric Cancer, West China Hospital, Sichuan University, Guo Xue Xiang

37, Chengdu, Sichuan, China. Email: chenxinzu@scu.edu.cn

**Supplementary Table 1. The brief characteristics and extracted data of the included studies.**

| Study        | Year | Country | Design | Follow-up period (range)<br>(Negative)/Eradicated/Persistent                                | Primary disease   | MGL outcome       | Event/total number |            |              |
|--------------|------|---------|--------|---------------------------------------------------------------------------------------------|-------------------|-------------------|--------------------|------------|--------------|
|              |      |         |        |                                                                                             |                   |                   | Negative           | Eradicated | Persistent   |
| Yoo, H. W.   | 2023 | Korea   | Cohort | 5.9 years (range 3.9-7.8)/5.3 years (range 3.4-7.4)                                         | Dysplasia         | MGC               | /                  | 747/34,209 | 1,659/35,513 |
|              |      |         |        |                                                                                             |                   | Dysplasia,        | /                  | 154/34,209 | 782/35,513   |
|              |      |         |        |                                                                                             |                   | MGC and dysplasia | /                  | 901/34,209 | 2,441/35,513 |
| Noh, C. K.   | 2023 | Korea   | Cohort | 25 months (IQR: 18-35) / 39 months (IQR: 27-57)                                             | Dysplasia         | MGC,              | /                  | 3/163      | 9/510        |
|              |      |         |        |                                                                                             |                   | Dysplasia,        | /                  | 3/163      | 13/510       |
|              |      |         |        |                                                                                             |                   | MGC and dysplasia | /                  | 6/163      | 22/510       |
| Nakata, R.   | 2021 | Japan   | Cohort | 40.0 months (IQR 26.0-59.8) /38.5 months (IQR 25.0-66.5)                                    | EGC               | MGC               | /                  | 5/126      | 17/126       |
| Kato, M.     | 2021 | Japan   | Cohort | 3.5 years (range 1.1–14.8)                                                                  | EGC               | MGC               | /                  | 52/294     | 35/189       |
| Ikeda, R.    | 2021 | Japan   | Cohort | 39.8 months (range 18–180 )                                                                 | EGC               | MGC               | 19/61              | 34/315     | 100/562      |
| Okada, K.    | 2019 | Japan   | Cohort | 4.1 years (range 3.0-5.7)/ 4.1years (range 2.9-5.6)                                         | EGC               | MGC               | /                  | 27/174     | 33/174       |
| Han, S. J.   | 2018 | Korea   | Cohort | 60, 61, and 60 months (range 12-122 )                                                       | EGC               | MGC               | 20/157             | 12/212     | 18/196       |
| Choi, J. M.  | 2018 | Korea   | RCT    | 71.7 months(range 44.2-91.7)/70.6 months (range 39.3-87.4)                                  | EGC and dysplasia | MGC               | /                  | 18/437     | 36/440       |
| Kwon, Y.     | 2017 | Korea   | Cohort | 47.7 months (range18.4–125 )                                                                | EGC               | MGC and dysplasia | 11/56              | 33/368     | 8/27         |
| Chung, C. S. | 2017 | Korea   | Cohort | 24 months (range:6 to 75)                                                                   | EGC               | MGC and dysplasia | /                  | 17/167     | 7/18         |
| Kim, S. B.   | 2016 | Korea   | Cohort | 36.18 months (±26.74)/32.78 months (±23.72)/33.29 months (±25.93)                           | EGC               | MGC               | 7/95               | 3/120      | 1/42         |
| Shin, S. H.  | 2015 | Korea   | Cohort | 53.0 months (range 26.3–85.7) /58.3 months (range 24.3–85.9) /57.2 months (range 28.1–85.2) | Dysplasia         | MGC,              | 4/124              | 4/122      | 3/36         |
|              |      |         |        |                                                                                             |                   | Dysplasia         | 15/124             | 6/122      | 4/36         |
| Jung, S.     | 2015 | Korea   | Cohort | 42.6 months                                                                                 | EGC and dysplasia | MGC and dysplasia | 4/366              | 10/169     | 21/506       |
| Kwon, Y. H.  | 2014 | Korea   | Cohort | 40 months (36–60)/ 44 months (37–60)                                                        | EGC               | MGC,              | /                  | 10/214     | 10/69        |
|              |      |         |        |                                                                                             |                   | Dysplasia         | /                  | 8/214      | 3/69         |

Abbreviations: EGC, early gastric cancer; IQR, inter-quartile range; MGC, metachronous gastric cancer; RCT, randomized controlled trial.

**Supplementary Table 1. The brief characteristics and extracted data of the included studies. (continued)**

| Study        | Year | Country | Design            | Follow-up period (range)<br>(Negative)/Eradicated/Persistent                          | Primary disease   | MGL outcome          | Event/total number |            |            |
|--------------|------|---------|-------------------|---------------------------------------------------------------------------------------|-------------------|----------------------|--------------------|------------|------------|
|              |      |         |                   |                                                                                       |                   |                      | Negative           | Eradicated | Persistent |
| Kim, Y. I.   | 2014 | Korea   | Cohort            | 4.1 years (range 3.1–5.8)/5.3years (range 4.0–8.3)/4.6 years (range 3. 1–6.1)         | EGC               | MGC                  | 13/218             | 2/49       | 16/107     |
| Choi, J.     | 2014 | Korea   | Open label<br>RCT | 36.7 months (range 23.9–54.8) /36.2 months (range 23.8–54.0)                          | EGC and dysplasia | MGC                  | /                  | 7/213      | 11/212     |
|              |      |         |                   |                                                                                       |                   | Low-grade dysplasia  | /                  | 3/176      | 6/174      |
|              |      |         |                   |                                                                                       |                   | High-grade dysplasia | /                  | 0/50       | 0/55       |
|              |      |         |                   |                                                                                       |                   | MGC and dysplasia    | /                  | 10/439     | 17/441     |
| Bae, S. E.   | 2014 | Korea   | Cohort            | 59.0 months (range 24 – 116)/ 59 months (range 24 – 137) /61.5 months(range 24 – 114) | EGC               | MGC                  | 17/340             | 34/485     | 24/182     |
| Maehata, Y.  | 2012 | Japan   | Cohort            | 3.0years (range 1.1-11.1)/ 3.0 years (range 1.1-10.3)                                 | EGC               | MGC                  | /                  | 15/177     | 13/91      |
| Shiotani, A. | 2008 | Japan   | Cohort            | 33 months (range 24–48 )                                                              | EGC               | MGC                  | 1/9                | 9/80       | 1/11       |
| Fukase, K.   | 2008 | Japan   | Open label<br>RCT | 3 years                                                                               | EGC               | MGC                  | /                  | 9/255      | 24/250     |
| Nakagawa, S. | 2006 | Japan   | Cohort            | 2.6years (range 0.5-8)/1.8years (range 0.5-12)                                        | EGC               | MGC                  | /                  | 8/356      | 129/2,479  |

Abbreviations: EGC, early gastric cancer; IQR, inter-quartile range; MGC, metachronous gastric cancer; RCT, randomized controlled trial.

**Supplementary Table 2. Newcastle-Ottawa scores for included cohort studies. #**

| Study        | Year | Selection                                |                                     |                           | Comparability                                                            | Outcome                                                         |                       |                                                  | Score |
|--------------|------|------------------------------------------|-------------------------------------|---------------------------|--------------------------------------------------------------------------|-----------------------------------------------------------------|-----------------------|--------------------------------------------------|-------|
|              |      | Representativeness of the exposed cohort | Selection of the non-exposed cohort | Ascertainment of exposure | Demonstration that outcome of interest was not present at start of study | Comparability of cohorts on the basis of the design or analysis | Assessment of outcome | Was follow-up long enough for outcomes to occur? |       |
| Yoo, H. W.   | 2023 | 1                                        | 1                                   | 1                         | 1                                                                        | 1                                                               | 1                     | 1                                                | 8     |
| Noh, C. K.   | 2023 | 1                                        | 1                                   | 1                         | 1                                                                        | 1                                                               | 1                     | 0                                                | 7     |
| Nakata, R.   | 2021 | 1                                        | 1                                   | 1                         | 1                                                                        | 1                                                               | 1                     | 0                                                | 7     |
| Kato, M.     | 2021 | 1                                        | 1                                   | 0                         | 1                                                                        | 1                                                               | 1                     | 0                                                | 6     |
| Ikeda, R.    | 2021 | 1                                        | 0                                   | 1                         | 1                                                                        | 1                                                               | 1                     | 0                                                | 6     |
| Okada, K.    | 2019 | 1                                        | 1                                   | 1                         | 1                                                                        | 1                                                               | 1                     | 1                                                | 8     |
| Han, S. J.   | 2018 | 1                                        | 1                                   | 0                         | 1                                                                        | 1                                                               | 1                     | 0                                                | 6     |
| Kwon, Y.     | 2017 | 1                                        | 1                                   | 1                         | 1                                                                        | 1                                                               | 1                     | 0                                                | 7     |
| Chung, C. S. | 2017 | 1                                        | 1                                   | 1                         | 1                                                                        | 1                                                               | 1                     | 0                                                | 7     |
| Mori, G.     | 2016 | 1                                        | 1                                   | 1                         | 1                                                                        | 1                                                               | 1                     | 1                                                | 8     |
| Kim, S. B.   | 2016 | 1                                        | 1                                   | 1                         | 1                                                                        | 0                                                               | 1                     | 0                                                | 6     |
| Shin, S. H.  | 2015 | 1                                        | 1                                   | 1                         | 1                                                                        | 0                                                               | 1                     | 0                                                | 6     |
| Jung, S.     | 2015 | 1                                        | 1                                   | 1                         | 1                                                                        | 0                                                               | 1                     | 1                                                | 7     |
| Kwon, Y. H.  | 2014 | 1                                        | 1                                   | 1                         | 1                                                                        | 1                                                               | 1                     | 1                                                | 8     |
| Kim, Y. I.   | 2014 | 1                                        | 1                                   | 1                         | 1                                                                        | 1                                                               | 1                     | 1                                                | 8     |
| Bae, S. E.   | 2014 | 1                                        | 1                                   | 1                         | 1                                                                        | 1                                                               | 1                     | 1                                                | 8     |
| Maehata, Y.  | 2012 | 1                                        | 1                                   | 1                         | 1                                                                        | 1                                                               | 1                     | 1                                                | 8     |
| Shiotani, A. | 2008 | 1                                        | 1                                   | 1                         | 1                                                                        | 0                                                               | 1                     | 1                                                | 7     |
| Nakagawa, S. | 2006 | 1                                        | 1                                   | 1                         | 1                                                                        | 1                                                               | 1                     | 1                                                | 8     |

# Studies were awarded a maximum of two points for the category “Comparability of cohorts on the basis of the design or analysis”; but for other categories, only a maximum of one point can be given.

---

**Supplementary Table 3. Cochrane risk of bias tool for included RCTs. #**

| <b>Study</b> | <b>Year</b> | <b>Random sequence generation (selection bias)</b> | <b>Allocation concealment (selection bias)</b> | <b>Blinding of participants and personnel (performance bias)</b> | <b>Blinding of outcome assessment (detection bias)</b> | <b>Incomplete outcome data (attrition bias)</b> | <b>Selective reporting (reporting bias)</b> | <b>Other bias</b> |
|--------------|-------------|----------------------------------------------------|------------------------------------------------|------------------------------------------------------------------|--------------------------------------------------------|-------------------------------------------------|---------------------------------------------|-------------------|
| Choi, J. M.  | 2018        | 1                                                  | 1                                              | 1                                                                | ?                                                      | 0                                               | 1                                           | 1                 |
| Choi, J.     | 2014        | 1                                                  | ?                                              | 0                                                                | ?                                                      | 0                                               | ?                                           | 1                 |
| Fukase, K.   | 2008        | 1                                                  | ?                                              | 0                                                                | 1                                                      | 0                                               | ?                                           | 1                 |

# Reviewers' judgment about each risk of bias for each included RCT, "0" for low risk of bias, "1" for high risk of bias, "?" for unclear risk of bias.

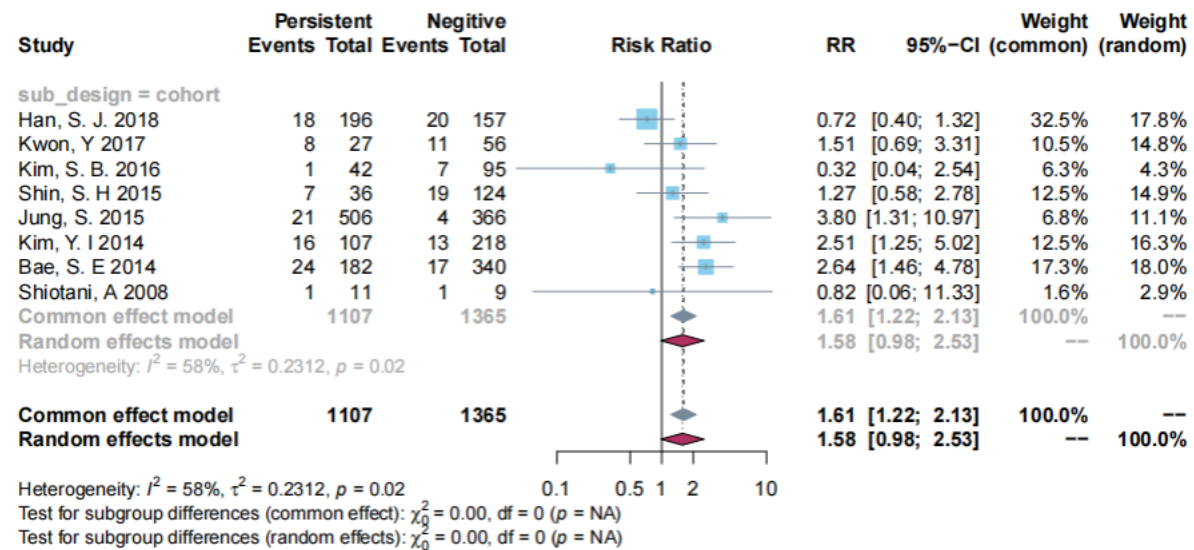

**Supplementary Figure 1.** Forest plot of subgroup analysis between persistent and negative patients stratified by study design.

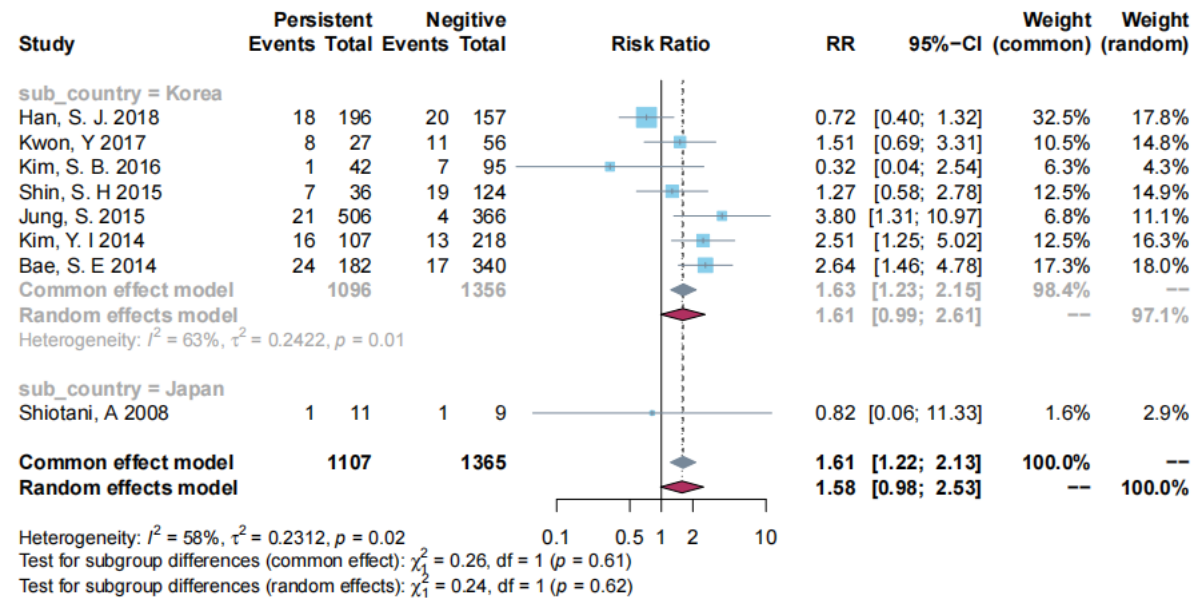

**Supplementary Figure 2.** Forest plot of subgroup analysis between persistent and negative patients stratified by country.

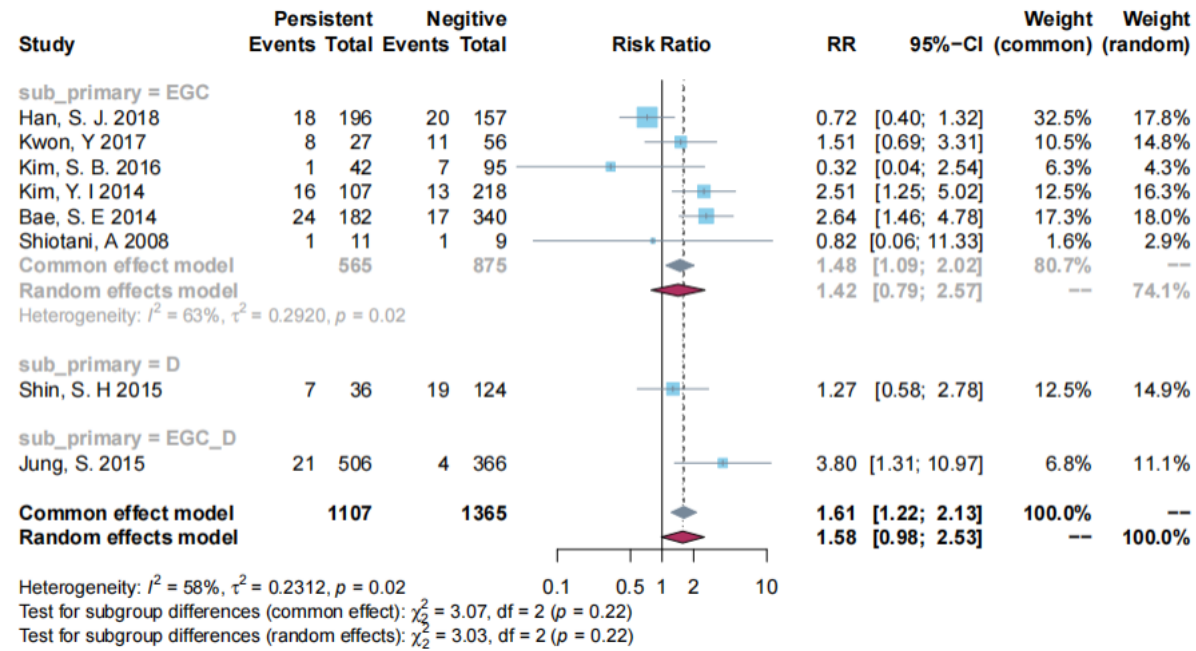

**Supplementary Figure 3.** Forest plot of subgroup analysis between persistent and negative patients stratified by primary disease.



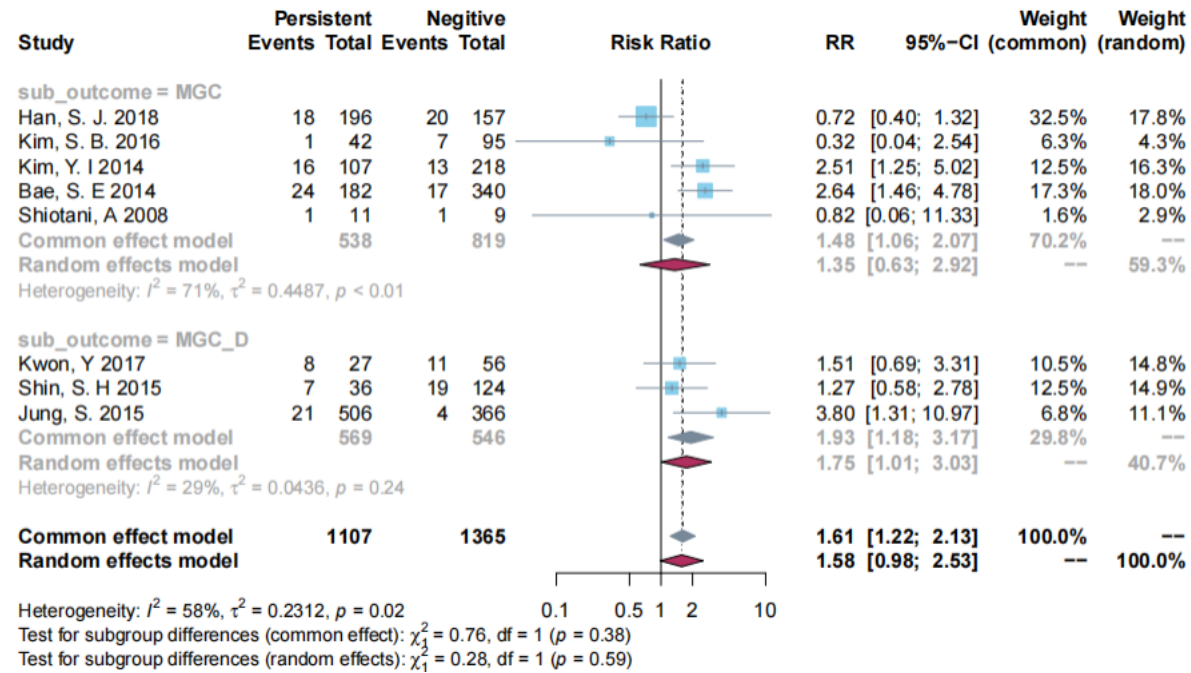

**Supplementary Figure 4.** Forest plot of subgroup analysis between persistent and negative patients stratified by outcome pattern.

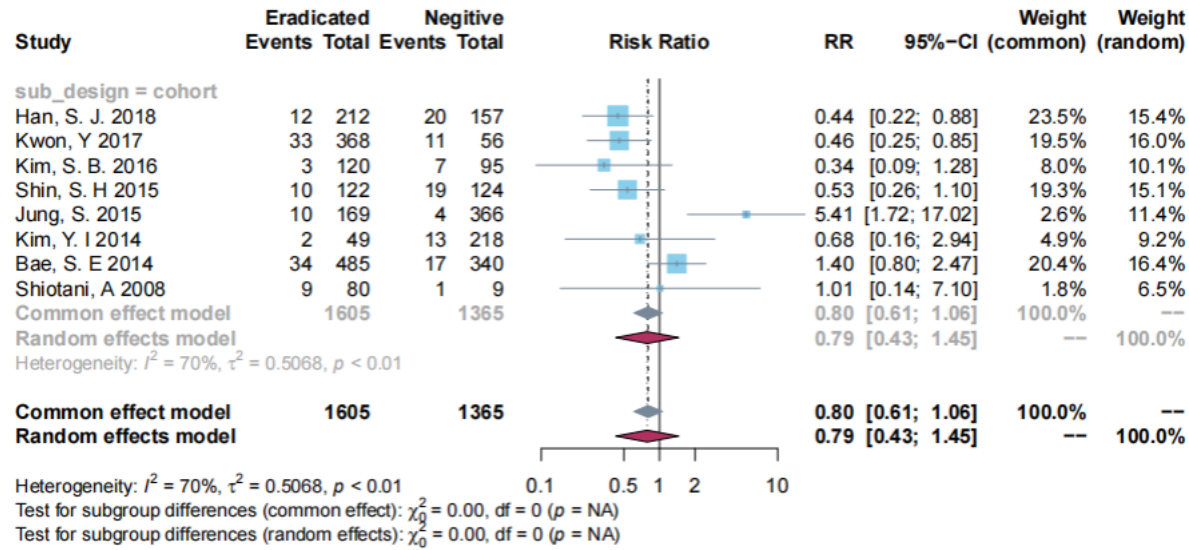

**Supplementary Figure 5.** Forest plot of subgroup analysis between eradicated and negative patients stratified by study design.

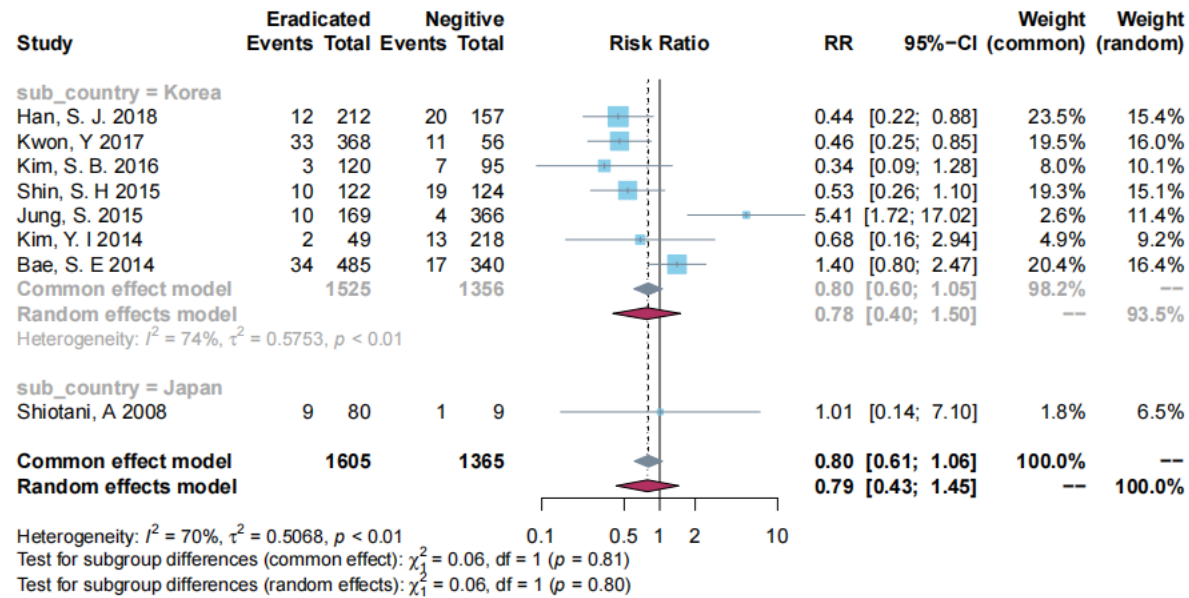

**Supplementary Figure 6.** Forest plot of subgroup analysis between eradicated and negative patients stratified by country.

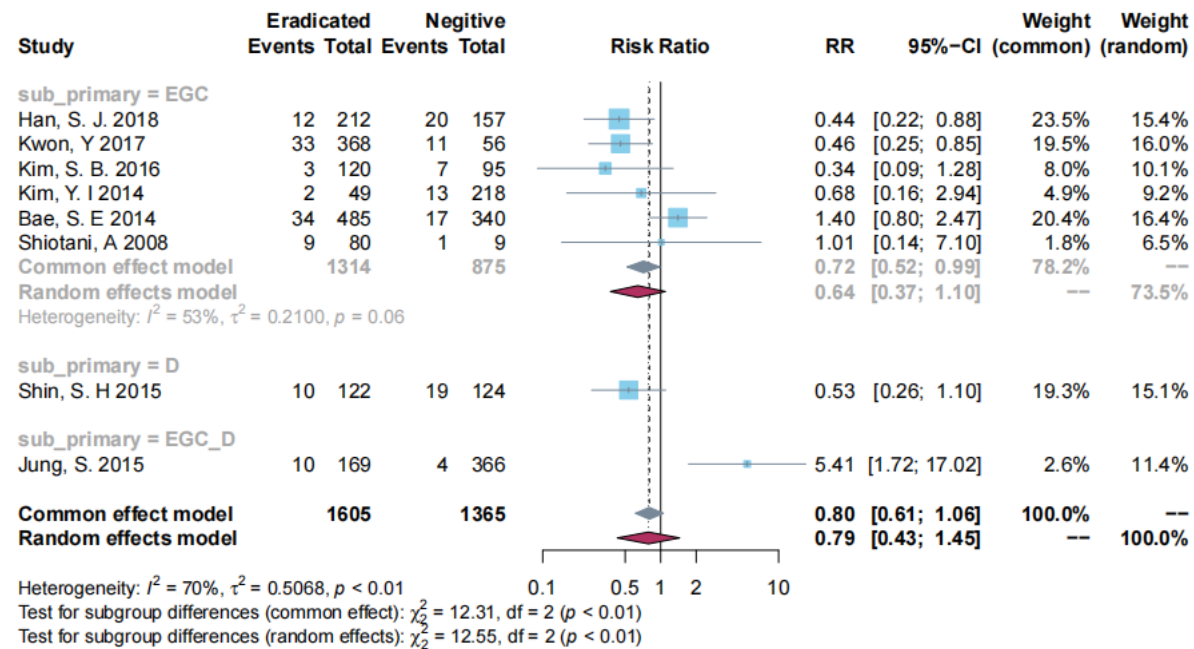

**Supplementary Figure 7.** Forest plot of subgroup analysis between eradicated and negative patients stratified by primary disease.

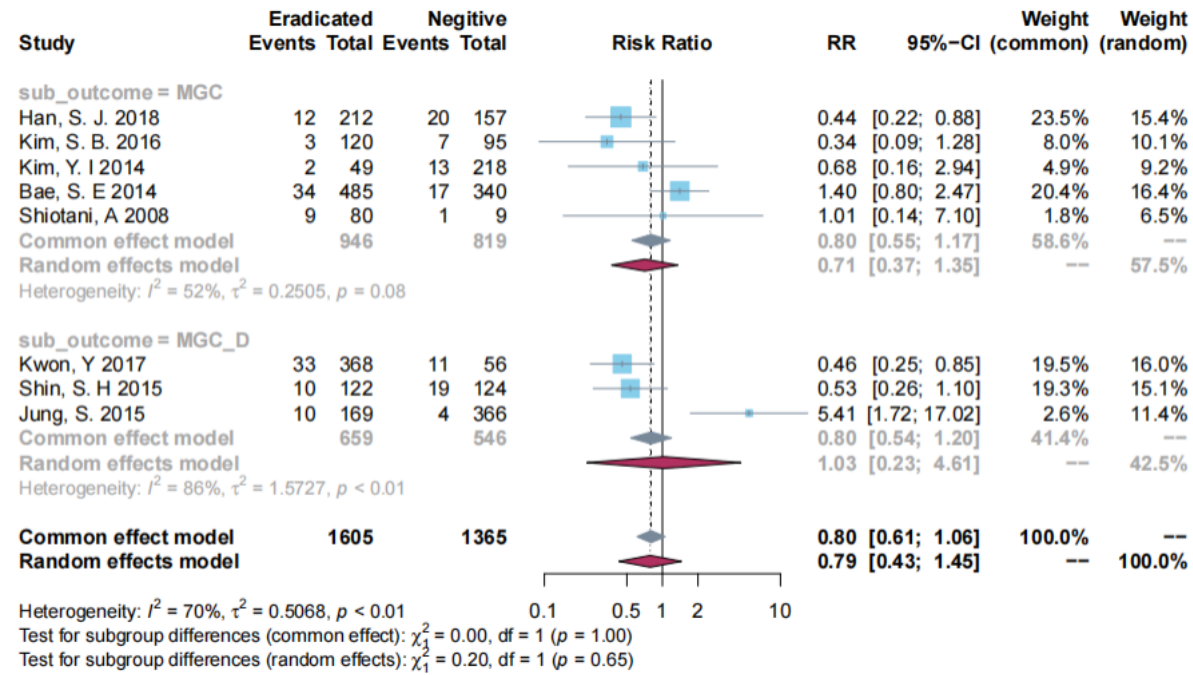

**Supplementary Figure 8.** Forest plot of subgroup analysis between eradicated and negative patients stratified by outcome pattern.

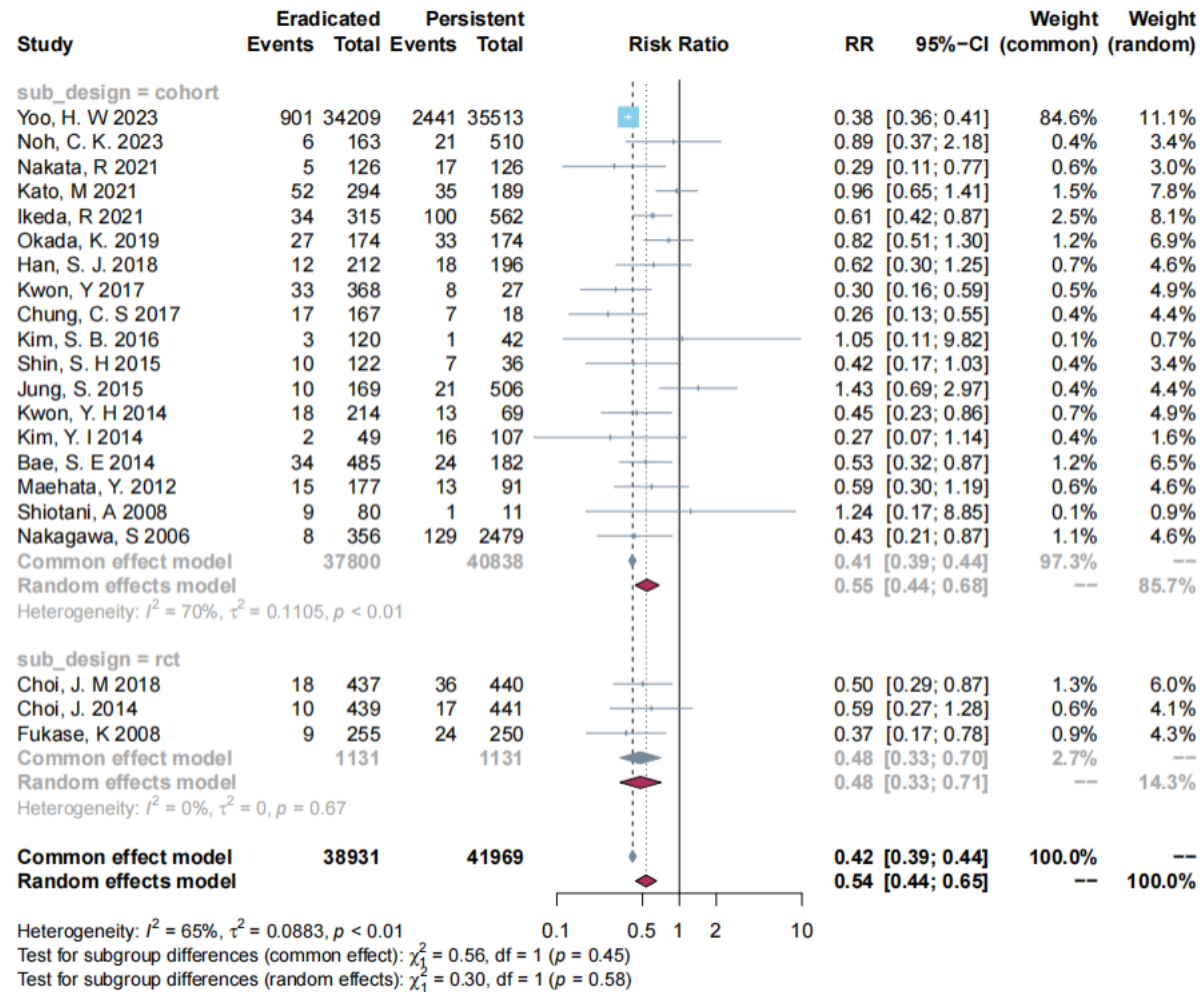

Supplementary Figure 9. Forest plot of subgroup analysis between eradicated and persistent patients stratified by study design.

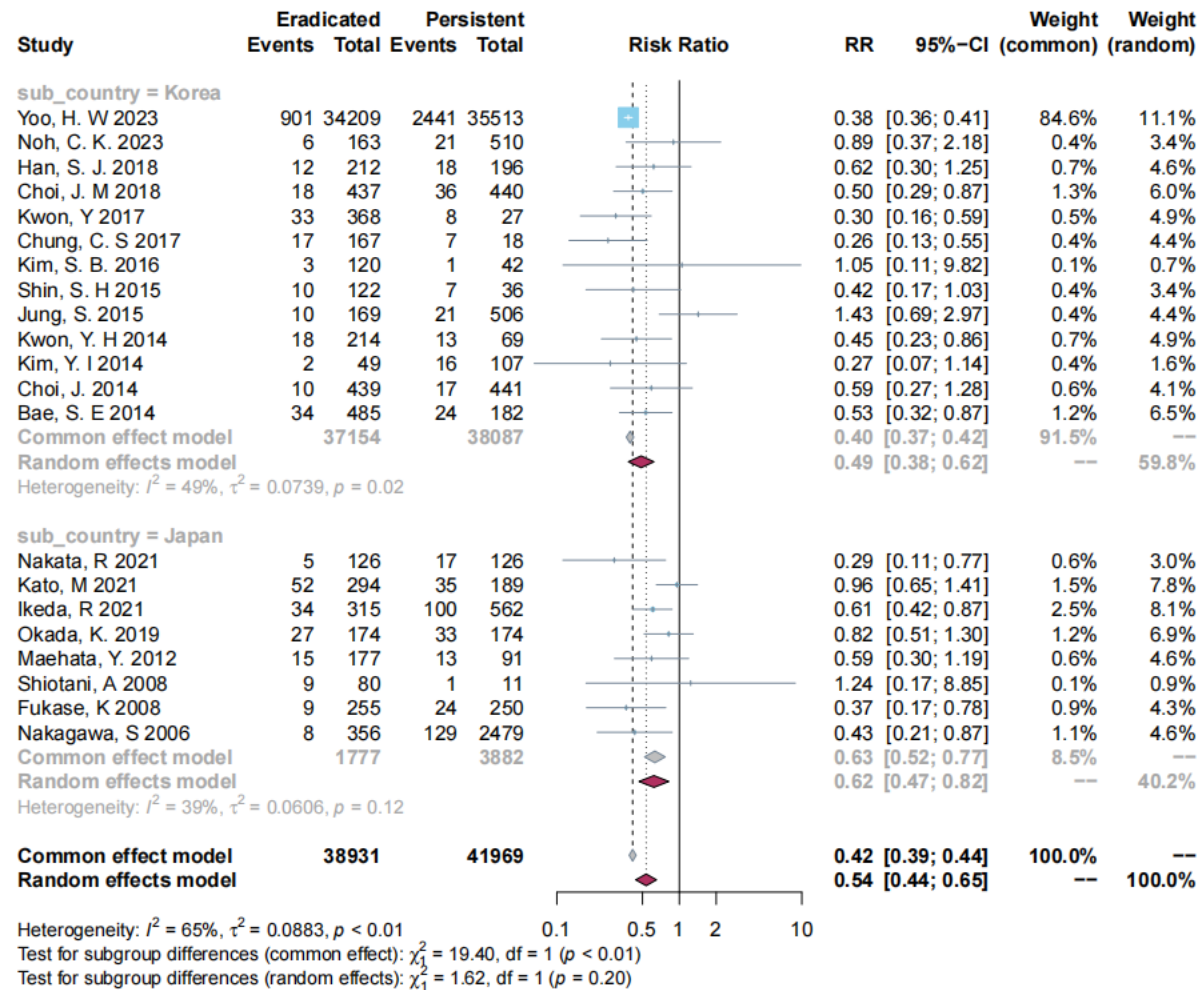

Supplementary Figure 10. Forest plot of subgroup analysis between eradicated and persistent patients stratified by country.

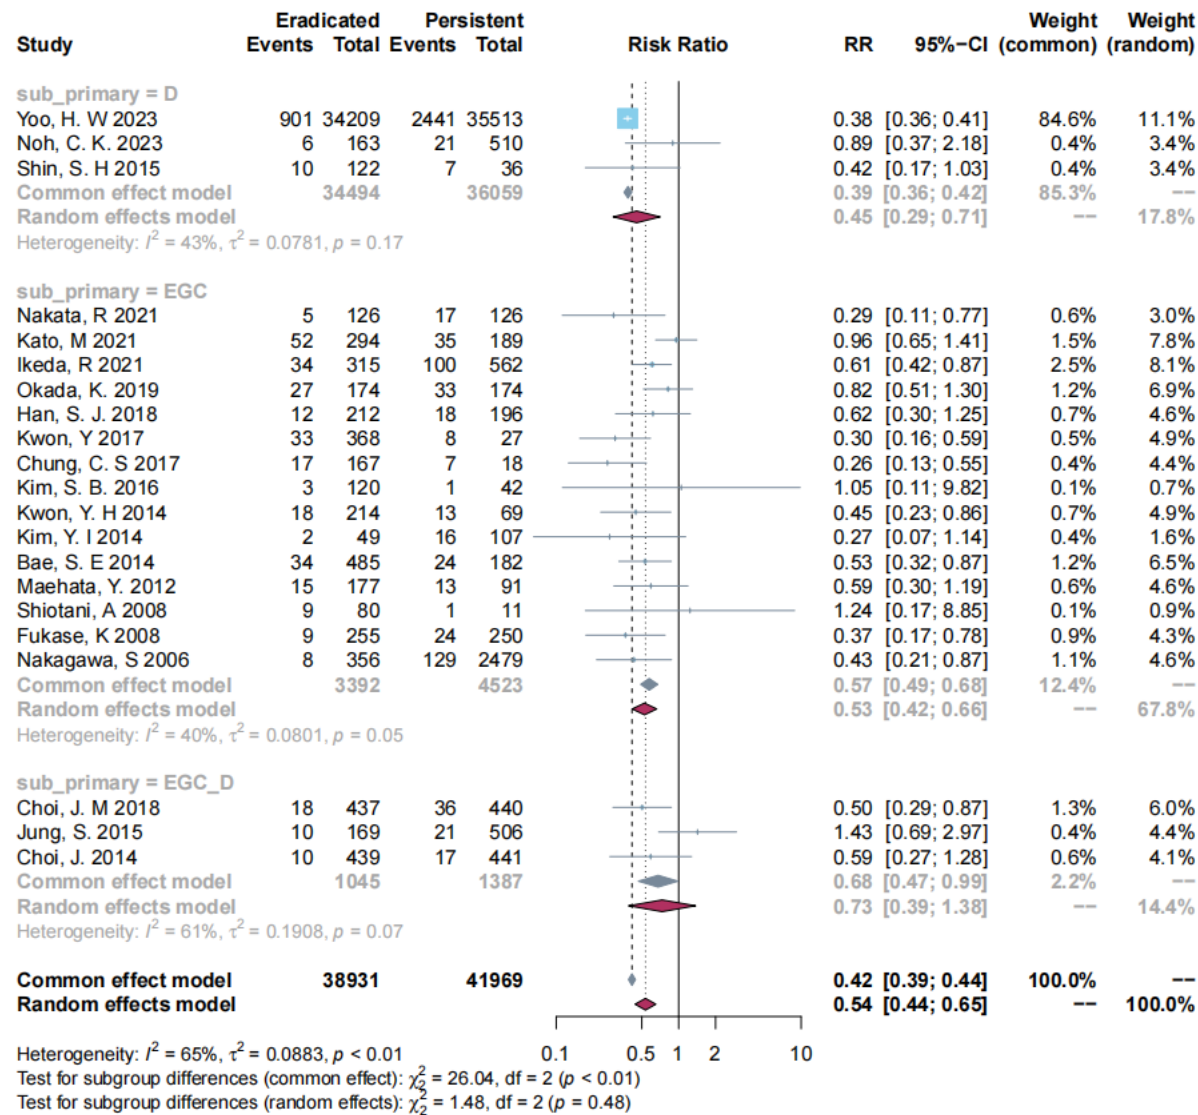

Supplementary Figure 11. Forest plot of subgroup analysis between eradicated and persistent patients stratified by primary disease.



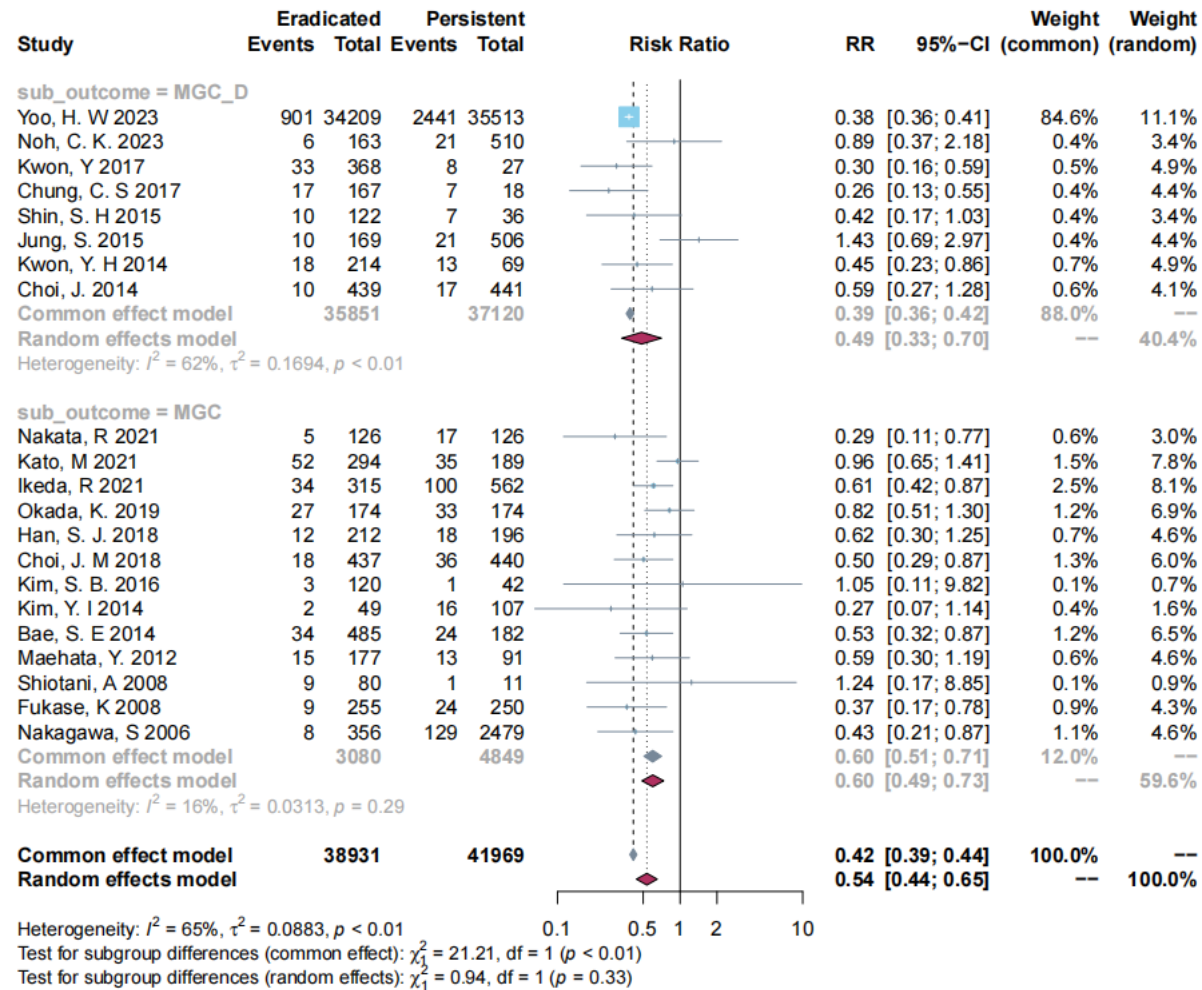

Supplementary Figure 12. Forest plot of subgroup analysis between eradicated and persistent patients stratified by outcome pattern.

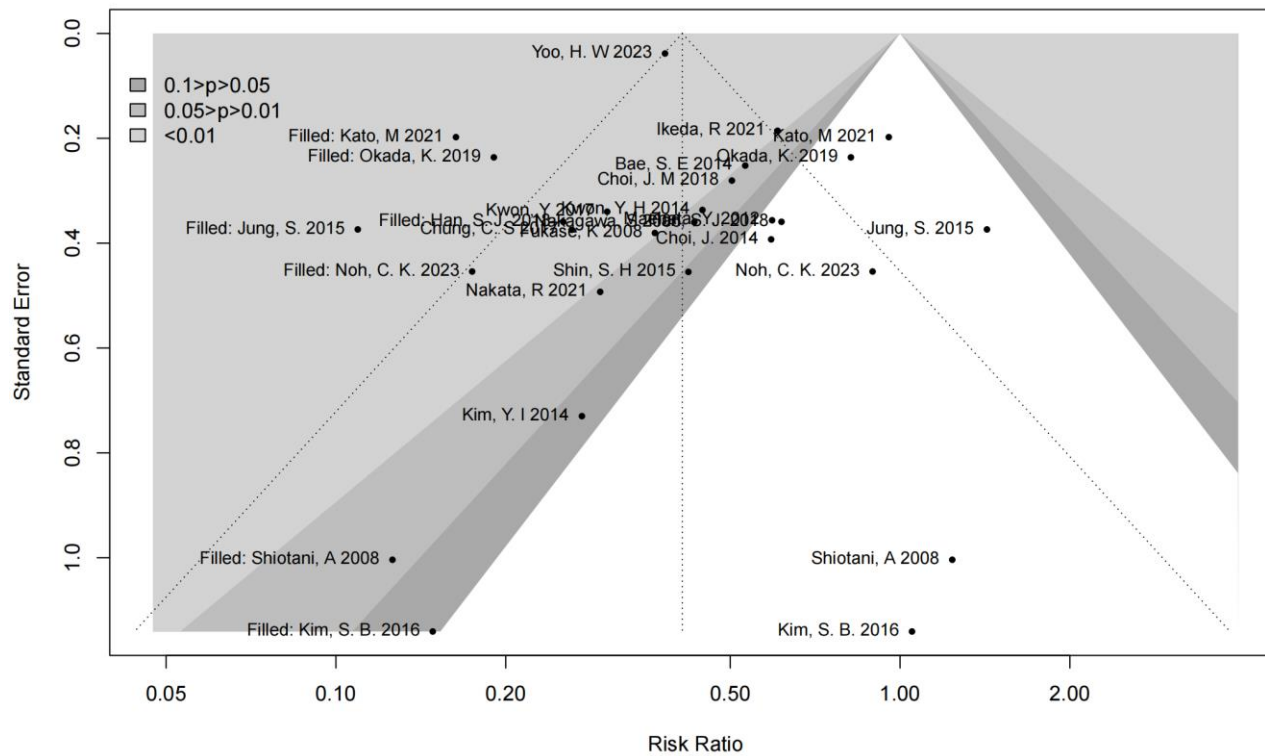

Supplement: Table_1.pdf [file Table_1.pdf]
